# Supplementary material for: An Integrated Patient-Centred Medical Home (PCMH) Care Model Reduces Prospective Healthcare Utilisation for Community-Dwelling Older Adults with Complex Needs: A Matched Observational Study in Singapore
Source: MDPI journal article supplement (doi:10.3390/ijerph20196848), 2023-09-27
Supplement: s1 [file s1]

## Supplementary Materials

### S1. Descriptive analysis for healthcare utilisation (intervention group n=165)

**Quarter:** Refers to a 3-month period, e.g., 4<sup>th</sup> quarter refers to the fourth 3-month period post-enrolment date in PCMH for the intervention group.

| Utilisation for each health service                   | Pre-enrolment                | Post-enrolment          |                         |                         |                         |                         |
|-------------------------------------------------------|------------------------------|-------------------------|-------------------------|-------------------------|-------------------------|-------------------------|
|                                                       | One quarter before enrolment | 1 <sup>st</sup> quarter | 2 <sup>nd</sup> quarter | 3 <sup>rd</sup> quarter | 4 <sup>th</sup> quarter | 5 <sup>th</sup> quarter |
| <b>No. of all-cause acute hospitalisations</b>        |                              |                         |                         |                         |                         |                         |
| <b>Pooled (n=165)</b>                                 |                              |                         |                         |                         |                         |                         |
| Mean (sd)                                             | 0.11 (0.37)                  | 0.10 (0.30)             | 0.10 (0.30)             | 0.12 (0.39)             | 0.11 (0.38)             | 0.10 (0.36)             |
| Median (IQR)                                          | 0 (0-0)                      | 0 (0-0)                 | 0 (0-0)                 | 0 (0-0)                 | 0 (0-0)                 | 0 (0-0)                 |
| Range (min-max)                                       | 0-2                          | 0-1                     | 0-1                     | 0-2                     | 0-3                     | 0-2                     |
| <b>Only among utilised n (%)</b>                      | 15 (9.1%)                    | 16 (9.7%)               | 17 (10.3%)              | 15 (9.1%)               | 15 (9.1%)               | 12 (7.27%)              |
| Mean (sd)                                             | 1.2 (0.41)                   | 1.0 (0.001)             | 1.0 (0.001)             | 1.3 (0.46)              | 1.2 (0.56)              | 1.25 (0.45)             |
| Median (IQR)                                          | 1 (1-1)                      | 1 (1-1)                 | 1 (1-1)                 | 1 (1-2)                 | 1 (1-1)                 | 1 (1-1.5)               |
| Range (min-max)                                       | 1-2                          | 1-1                     | 1-1                     | 1-2                     | 1-3                     | 1-2                     |
| <b>No. of emergency department visits</b>             |                              |                         |                         |                         |                         |                         |
| <b>Pooled (n=165)</b>                                 |                              |                         |                         |                         |                         |                         |
| Mean (sd)                                             | 0.16 (0.55)                  | 0.15 (0.41)             | 0.15 (0.39)             | 0.19 (0.50)             | 0.12 (0.39)             | 0.08 (0.32)             |
| Median (IQR)                                          | 0 (0-0)                      | 0 (0-0)                 | 0 (0-0)                 | 0 (0-0)                 | 0 (0-0)                 | 0 (0-0)                 |
| Range (min-max)                                       | 0-4                          | 0-2                     | 0-2                     | 0-2                     | 0-3                     | 0-2                     |
| <b>Only among utilised n (%)</b>                      | 18 (10.9%)                   | 22 (13.3%)              | 22 (13.3%)              | 23 (13.9%)              | 16 (9.7%)               | 11 (6.67%)              |
| Mean (sd)                                             | 1.4 (0.98)                   | 1.14 (0.35)             | 1.09 (0.29)             | 1.35 (0.49)             | 1.19 (0.54)             | 1.18 (0.40)             |
| Median (IQR)                                          | 1 (1-1)                      | 1 (1-1)                 | 1 (1-1)                 | 1 (1-2)                 | 1 (1-1)                 | 1 (1-1)                 |
| Range (min-max)                                       | 1-4                          | 1-2                     | 1-2                     | 1-2                     | 1-3                     | 1-2                     |
| <b>No. of specialist outpatient clinic visits</b>     |                              |                         |                         |                         |                         |                         |
| <b>Pooled (n=165)</b>                                 |                              |                         |                         |                         |                         |                         |
| Mean (sd)                                             | 1.47 (2.18)                  | 1.56 (2.72)             | 1.96 (4.46)             | 1.36 (2.34)             | 1.29 (2.33)             | 0.95 (1.88)             |
| Median (IQR)                                          | 0 (0-2)                      | 0 (0-3)                 | 0 (0-2)                 | 0 (0-2)                 | 0 (0-2)                 | 0 (0-1)                 |
| Range (min-max)                                       | 0-10                         | 0-18                    | 0-44                    | 0-14                    | 0-14                    | 0-13                    |
| <b>Only among utilised n (%)</b>                      | 72 (43.6%)                   | 72 (43.6%)              | 71 (43.0%)              | 69 (41.8%)              | 61 (37.0%)              | 46 (27.88%)             |
| Mean (sd)                                             | 2.53 (2.65)                  | 3.57 (3.13)             | 4.55 (5.88)             | 3.26 (2.62)             | 3.49 (2.65)             | 3.20 (2.17)             |
| Median (IQR)                                          | 2 (0-4)                      | 3 (2-4)                 | 3 (1-5)                 | 3 (2-4)                 | 3 (2-4)                 | 3 (2-4)                 |
| Range (min-max)                                       | 0-10                         | 1-18                    | 1-44                    | 1-14                    | 1-14                    | 1-13                    |
| <b>No. of public primary care (polyclinic) visits</b> |                              |                         |                         |                         |                         |                         |
| <b>Pooled (n=165)</b>                                 |                              |                         |                         |                         |                         |                         |
| Mean (sd)                                             | 0.61 (1.03)                  | 0.33 (0.77)             | 0.22 (0.57)             | 0.22 (0.64)             | 0.24 (0.72)             | 0.21 (0.72)             |
| Median (IQR)                                          | 0 (1-2)                      | 0 (0-0)                 | 0 (0-0)                 | 0 (0-0)                 | 0 (0-0)                 | 0 (0-0)                 |
| Range (min-max)                                       | 0-5                          | 0-3                     | 0-3                     | 0-4                     | 0-5                     | 0-6                     |

|                                         |             |             |             |             |             |             |
|-----------------------------------------|-------------|-------------|-------------|-------------|-------------|-------------|
| <b>Only among<br/>utilised</b><br>n (%) | 54 (32.7%)  | 30 (18.2%)  | 24 (14.6%)  | 23 (13.9%)  | 24 (14.6%)  | 18 (10.91%) |
| Mean (sd)                               | 1.87 (0.93) | 1.80 (0.76) | 1.50 (0.59) | 1.61 (0.84) | 1.63 (1.17) | 1.78 (1.31) |
| Median (IQR)                            | 2 (1-2)     | 2 (1-2)     | 1 (1-2)     | 1 (1-2)     | 1 (1-2)     | 1 (1-2)     |
| Range (min-<br>max)                     | 1-5         | 1-3         | 1-3         | 1-4         | 1-5         | 1-6         |
